# Supplementary material for: Active hydrogen boosts electrochemical nitrate reduction to ammonia
Source: PubMed Central journal article supplement (PMC9794814; doi:10.1038/s41467-022-35664-w), 2022-12-27
Supplement: 41467_2022_35664_MOESM1_ESM.pdf [file 41467_2022_35664_MOESM1_ESM.pdf]

## Supplementary Information

### **Active hydrogen boosts electrochemical nitrate reduction to ammonia**

Kui Fan<sup>1</sup>, Wenfu Xie<sup>1</sup>, Jinze Li<sup>1</sup>, Yining Sun<sup>1</sup>, Pengcheng Xu<sup>1</sup>, Yang Tang<sup>2</sup>, Zhenhua Li<sup>1</sup> and Mingfei Shao<sup>1\*</sup>

<sup>1</sup>State Key Laboratory of Chemical Resource Engineering, Beijing University of Chemical Technology, Beijing 100029, China

<sup>2</sup>Institute of Applied Electrochemistry, Beijing University of Chemical Technology, Beijing 100029, China.

\*Corresponding author. E-mail: shaomf@mail.buct.edu.cn

## Supplementary Figures

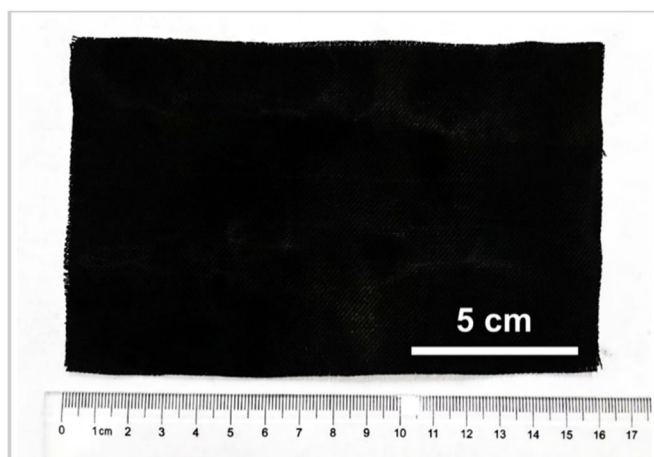

**Supplementary Fig. 1 | Optical photograph of the electrode.** Optical photograph of self-supported CoP-CNS with large area of about  $160 \text{ cm}^{-2}$ .

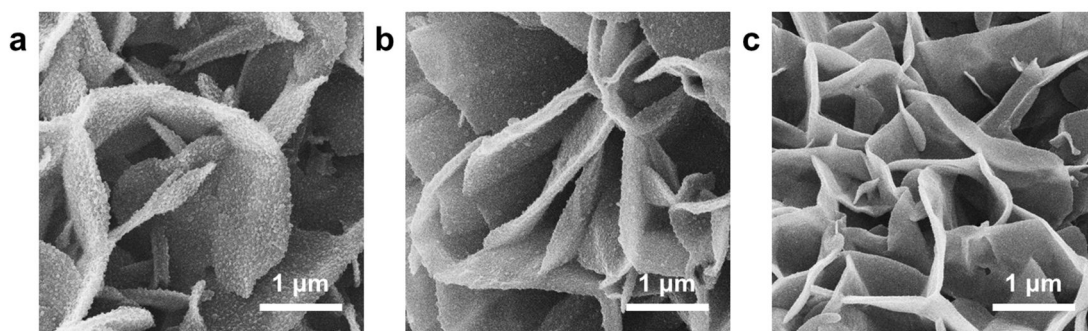

**Supplementary Fig. 2 | Characterizations of different catalysts.** SEM images of **a**, Co-CNS, **b**, CoP-CNS and **c**, CNS.

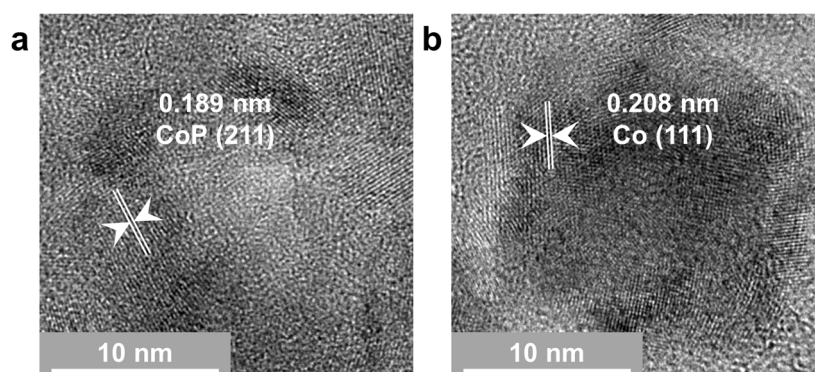

**Supplementary Fig. 3 | Characterizations of different catalysts.** HRTEM images of **a**, CoP-CNS and **b**, Co-CNS.

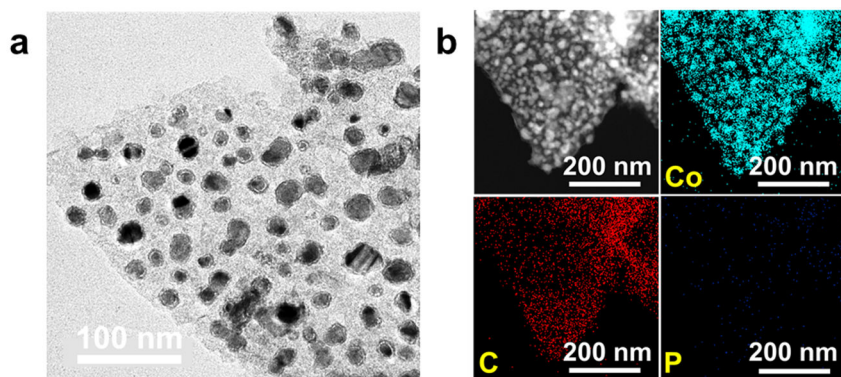

**Supplementary Fig. 4 | Characterizations of Co-CNS.** a, HRTEM and b, corresponding EDX mapping images of Co-CNS.

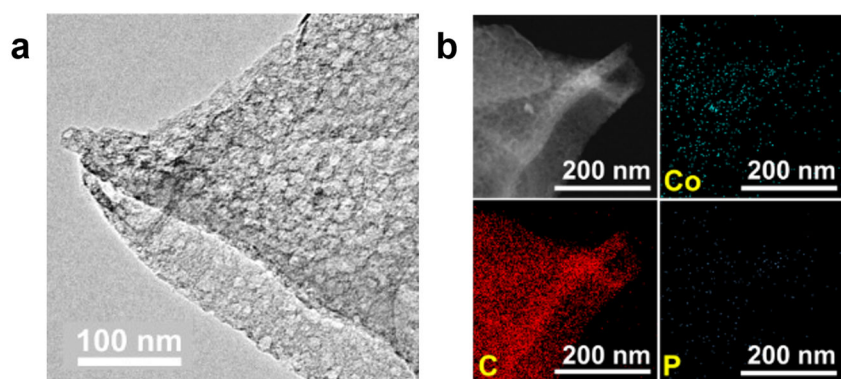

**Supplementary Fig. 5 | Characterizations of CNS.** a, HRTEM and corresponding b, EDX mapping images of CNS.

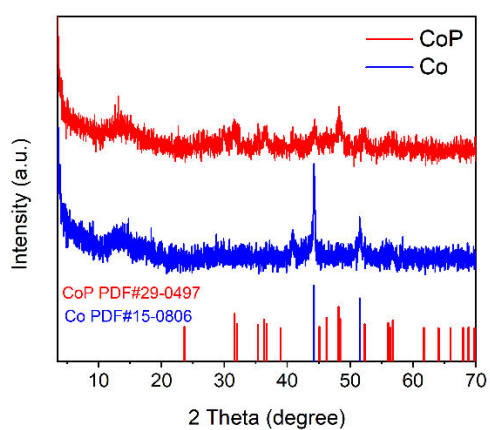

**Supplementary Fig. 6 | Characterizations of control samples.** XRD pattern of CoP and Co, respectively.

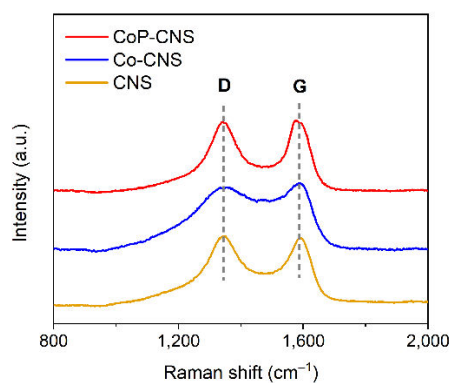

**Supplementary Fig. 7 | Characterizations of different catalysts.** Ex-situ Raman spectra of Co-CNS, CoP-CNS and CNS.

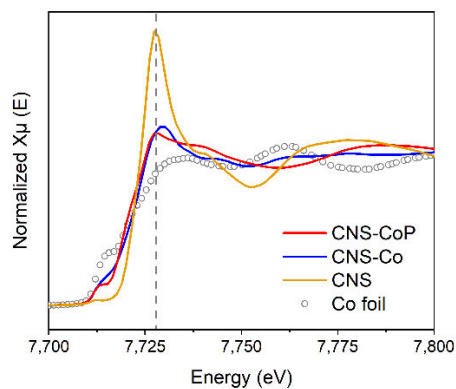

**Supplementary Fig. 8 | Characterizations of different catalysts.** XANES spectra at the Co K-edge of Co foil, CoP-CNS, Co-CNS and CNS, respectively.

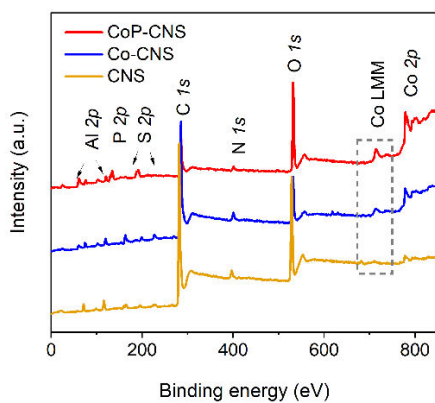

**Supplementary Fig. 9 | Characterizations of different catalysts.** The full XPS spectrum of CoP-CNS, Co-CNS and CNS, respectively.

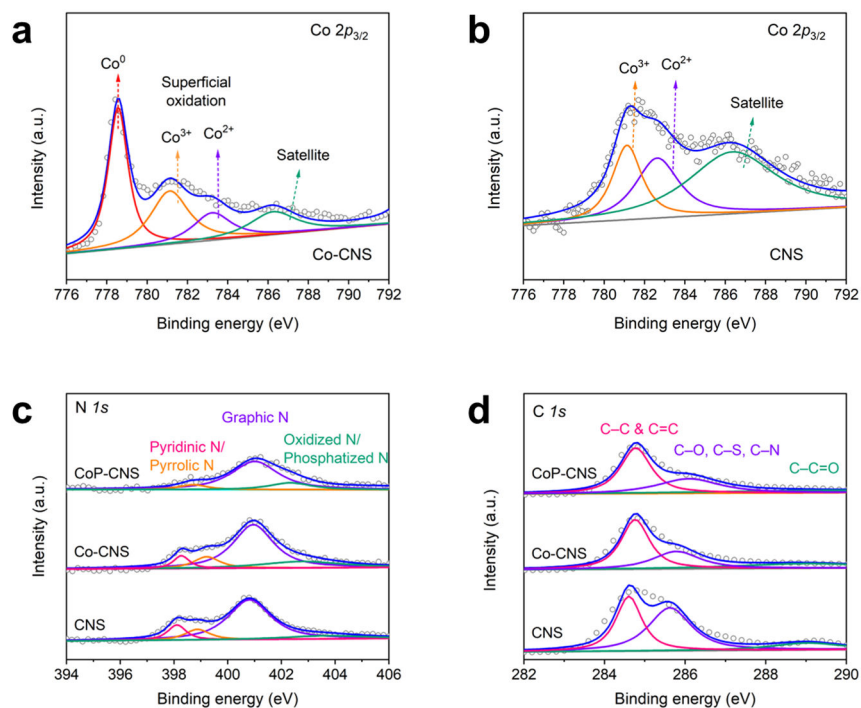

**Supplementary Fig. 10 | Characterizations of different catalysts.** High-resolution XPS spectra of Co  $2p_{3/2}$  in **a**, Co-CNS and **b**, CNS, respectively. High-resolution XPS spectra of **c**, N  $1s$  and **d**, C  $1s$  of CoP-CNS, Co-CNS and CNS.

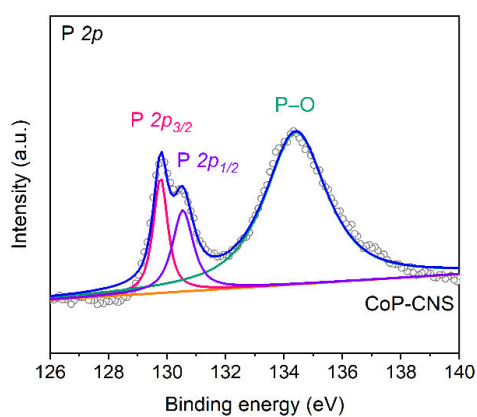

**Supplementary Fig. 11 | Characterization of CoP-CNS.** High-resolution XPS spectra of P  $2p$  in CoP-CNS.

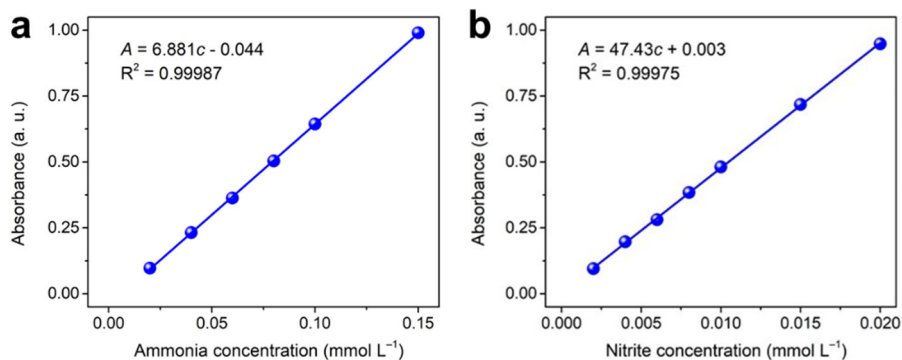

**Supplementary Fig. 12 | Calibration curves.** UV-vis calibration curves of **a**, ammonia ( $\text{NH}_3$ ) and **b**, nitrite ( $\text{NO}_2^-$ ), respectively.

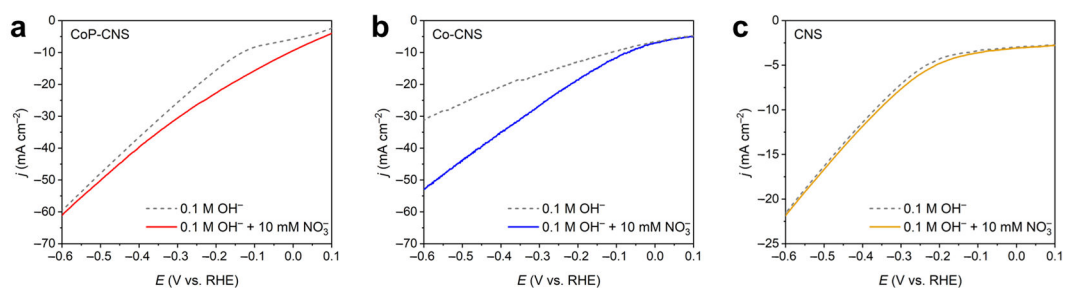

**Supplementary Fig. 13 | Electrochemical performances.** LSV curves of **a**, CoP-CNS, **b**, Co-CNS and **c**, CNS in 0.1 M  $\text{OH}^-$  with and without 10 mM  $\text{NO}_3^-$ .

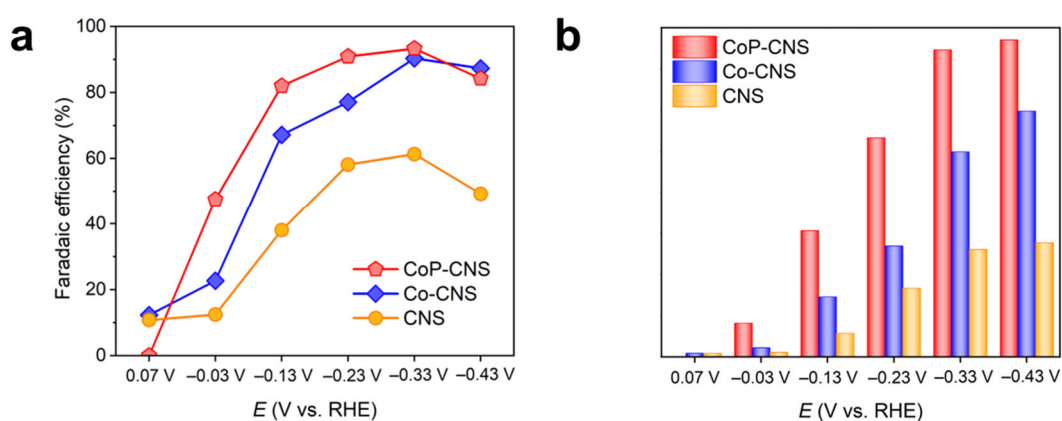

**Supplementary Fig. 14 | Electrochemical performances.** **a**,  $\text{NH}_3$  FEs and **b**, corresponding yield rates of CoP-CNS, Co-CNS and CNS in 0.1 M  $\text{OH}^-$  with 10 mM  $\text{NO}_3^-$  from 0.07 to  $-0.43$  V vs. RHE.



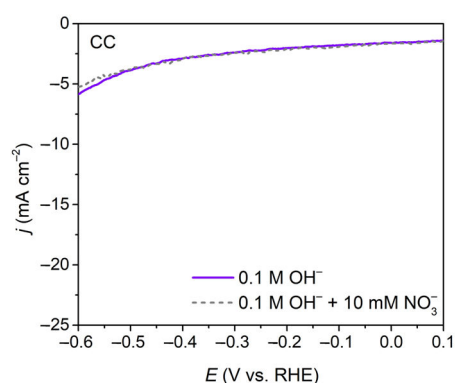

**Supplementary Fig. 15 | Electrochemical performances.** LSV curves of CC substrate in 0.1 M  $\text{OH}^-$  with and without 10 mM  $\text{NO}_3^-$ .

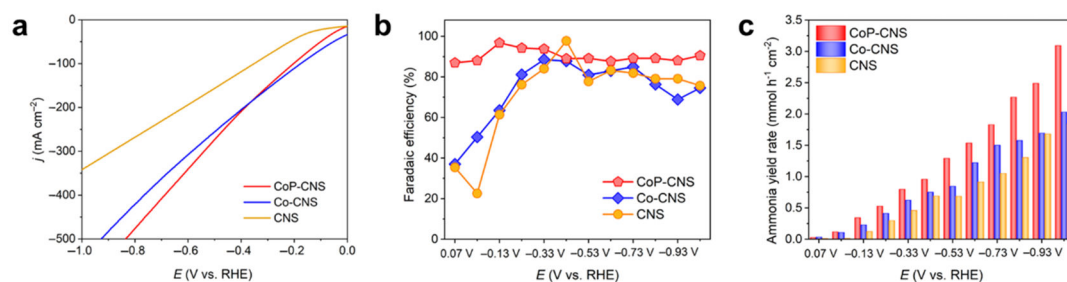

**Supplementary Fig. 16 | Electrochemical performances.** **a**, LSV curves, **b**,  $\text{NH}_3$  FE and **c**, corresponding yield rates of CoP-CNS, Co-CNS and CNS in 1.0 M  $\text{OH}^-$  with 1.0 M  $\text{NO}_3^-$  from 0.07 to  $-1.03$  V vs. RHE.

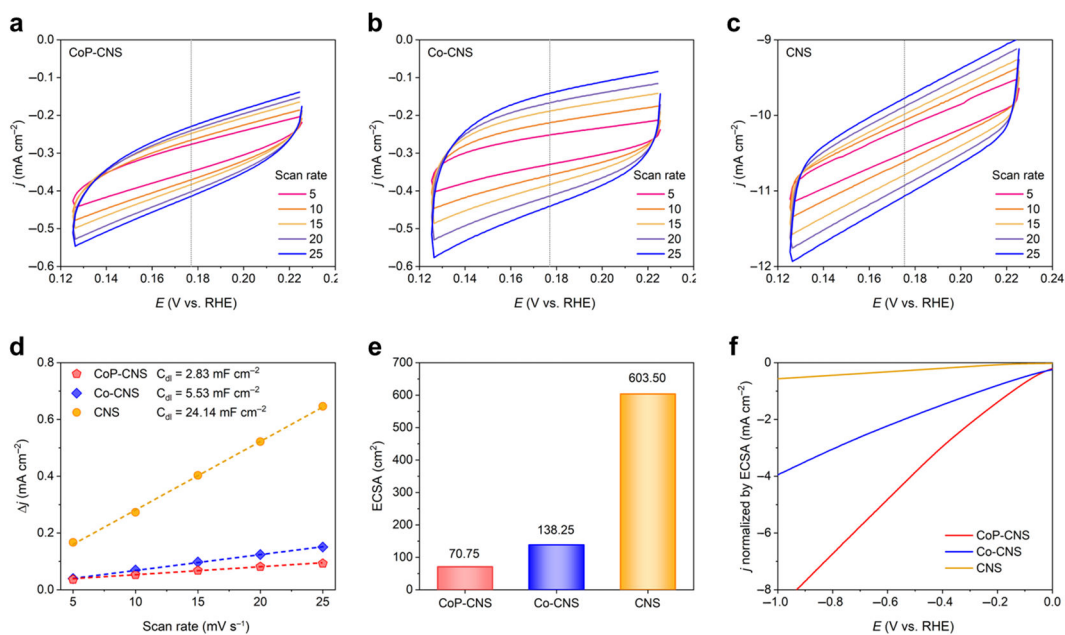

**Supplementary Fig. 17 | Comparison of the ECSAs of different samples.** CV of **a**, CoP-CNS, **b**, Co-CNS and **c**, CNS over a potential window without Faradic current densities at different scan rates. **d**, Curves of capacitance  $\Delta j$  as a function of different scan rates. **e**, ECSAs of CoP-CNS, Co-CNS and CNS. **f**, LSV curves normalized by ECSA in 1.0 M OH<sup>-</sup> with 1.0 M NO<sub>3</sub><sup>-</sup>.

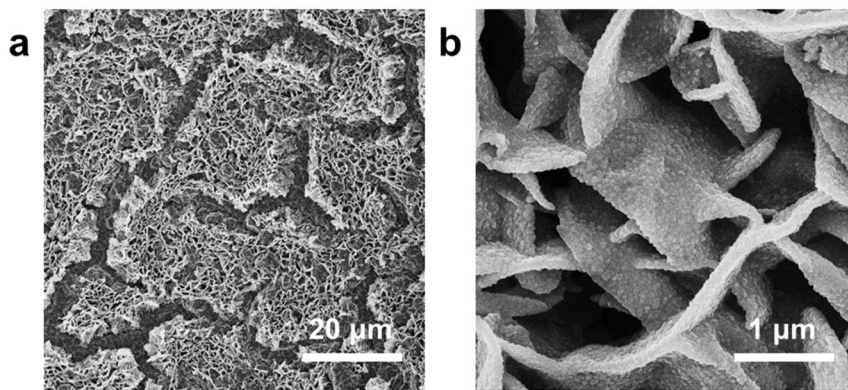

**Supplementary Fig. 18 | Characterisation of CoP-CNS on Cu foam.** SEM images of CoP-CNS on Cu foam with **a**, low and **b**, high magnification.



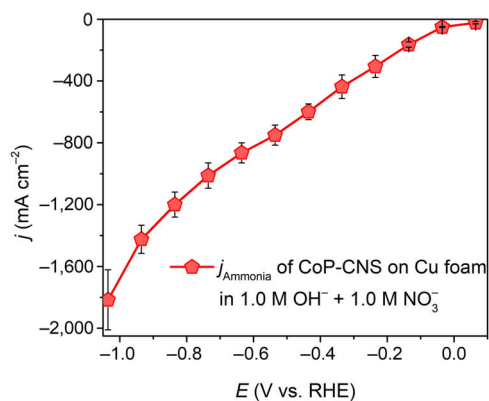

**Supplementary Fig. 19 | Electrochemical performances.**  $\text{NH}_3$  partial current densities of CoP-CNS on Cu foam under potential range from 0.07 to  $-1.03$  V vs. RHE estimated by three independent tests.

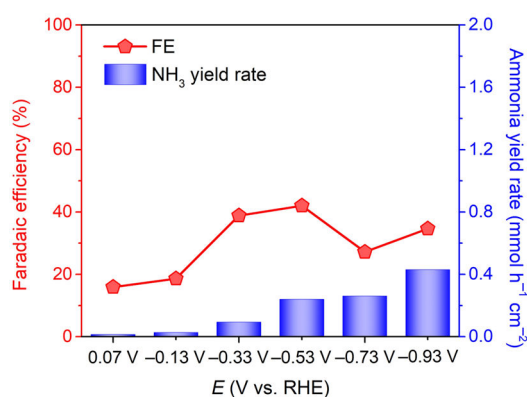

**Supplementary Fig. 20 | Electrochemical performances.**  $\text{NH}_3$  FEs and corresponding yield rates of Cu foam substrate from 0.07 to  $-0.93$  V vs. RHE.

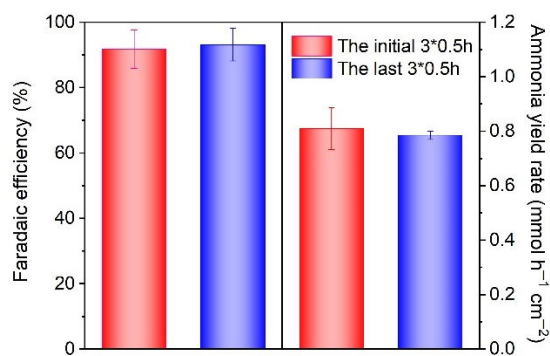

**Supplementary Fig. 21 | Electrochemical performances.** Comparison of  $\text{NH}_3$  FEs and yields of CoP-CNS before and after stability test.

Different from the 0.5 h electrolysis, the consumption of reactants caused by 3 h continuous electrolysis cannot be ignored, which may slightly reduce the FE of CoP-CNS. Therefore, 0.5 h chronoamperometric measurement were carried out before and after the stability test for 3 times, respectively. It was found that the FE and yield rate were almost unchanged, and were consistent with that in Fig. 2b.

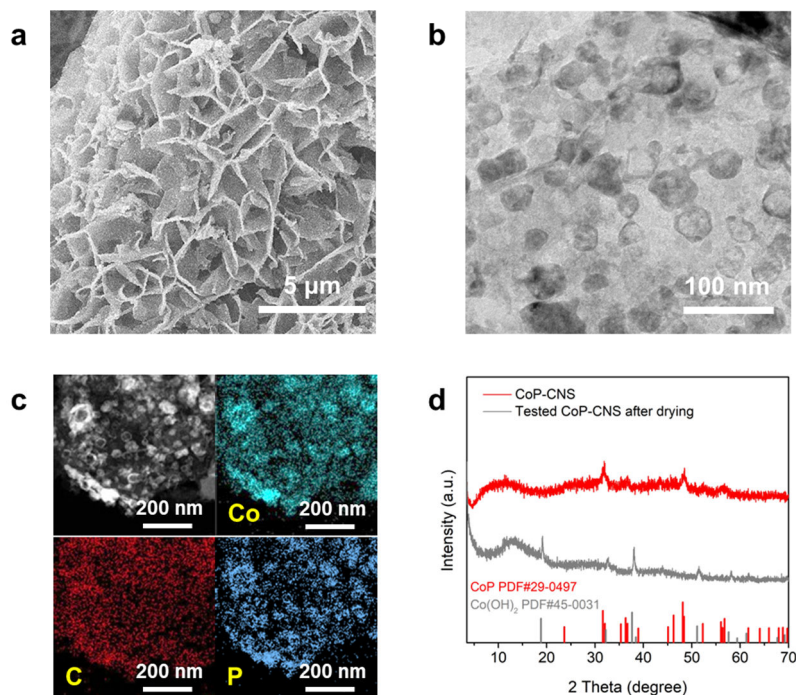

**Supplementary Fig. 22 | Characterizations of the tested CoP-CNS. a, SEM, b, corresponding EDX mapping, c, STEM images, and d, XRD pattern of CoP-CNS after NITRR testing.**

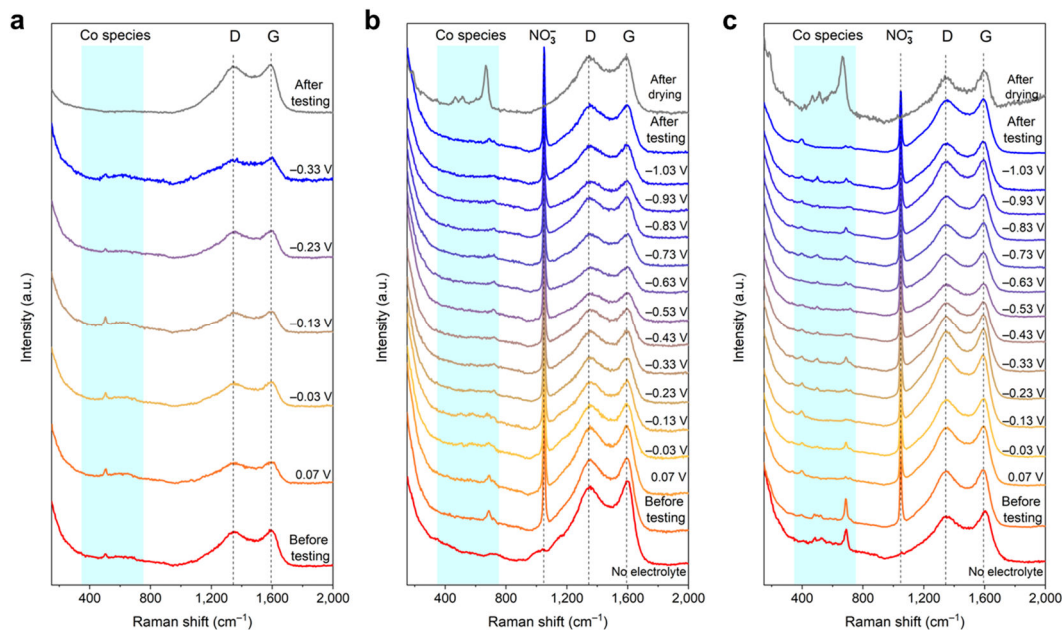

**Supplementary Fig. 23 | Characterizations of different catalysts.** In situ Raman spectra of **a**, CoP-CNS in 1.0 M OH<sup>-</sup>, **b**, CoP-CNS in 1.0 M OH<sup>-</sup> with 1.0 M NO<sub>3</sub><sup>-</sup> and **c**, Co-CNS in 1.0 M OH<sup>-</sup> with 1.0 M NO<sub>3</sub><sup>-</sup>, respectively.

Before testing, no obvious peak is observed in the range from 400 to 800 cm<sup>-1</sup>. A sharp peak corresponding to NO<sub>3</sub><sup>-</sup> appears at 1,050 cm<sup>-1</sup> when electrolyte is added. The new characteristic peaks of Co(OH)<sub>2</sub> and its oxidation products are only observed in the dried sample, which proven that no phase transition in CNS-CoP occurs during the testing.

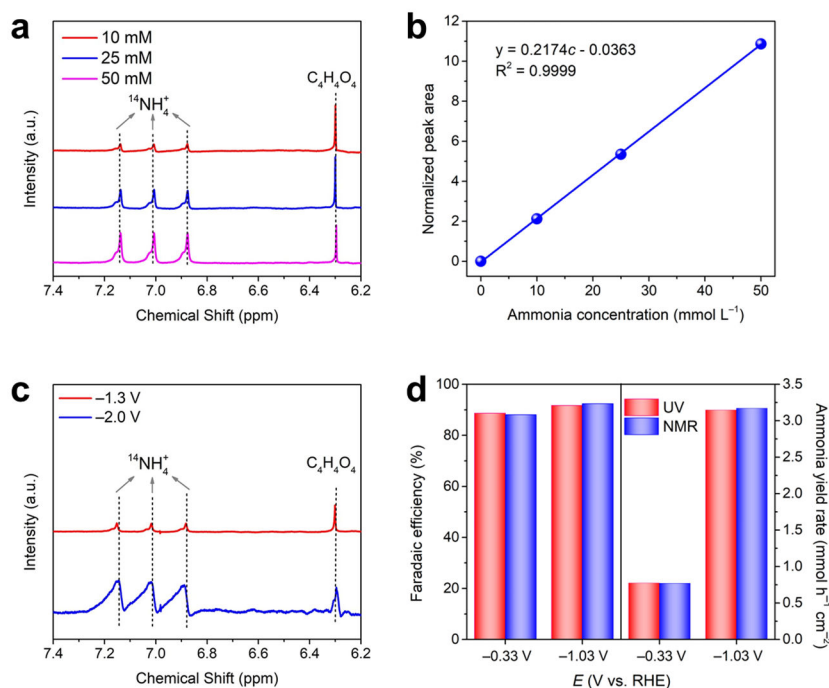

**Supplementary Fig. 24 | Product analysis.** **a**,  $^1\text{H}$  NMR calibration curve of  $\text{NH}_3$  using ammonium chloride solutions of known concentration as standards. **b**,  $^1\text{H}$  NMR calibration curve of  $\text{NO}_3^-$ . **c**,  $^1\text{H}$  NMR spectra for the electrolytes after  $^{14}\text{NO}_3^-$  reduction tests at  $-0.33$  and  $-1.03$  V. **d**, The FEs and yields of  $\text{NH}_3$  calculated by  $^1\text{H}$  NMR and UV-vis at  $-0.33$  and  $-1.03$  V.

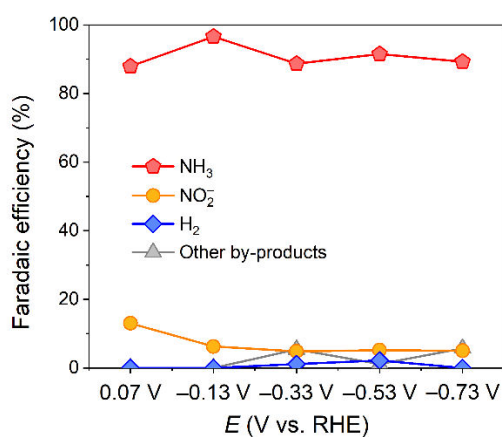

**Supplementary Fig. 25 | Product analysis.** Product distribution of CoP-CNS at various applied potentials in  $1.0$  M  $\text{OH}^-$  with  $1.0$  M  $\text{NO}_3^-$ .

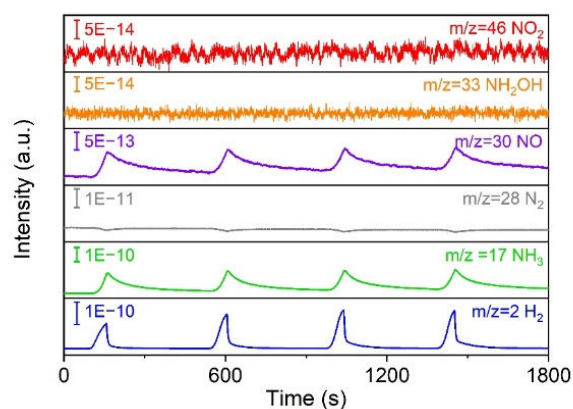

**Supplementary Fig. 26 | Product analysis.** In situ DEMS measurement of CoP-CNS in 1.0 M OH<sup>-</sup> with 1.0 M NO<sub>3</sub><sup>-</sup>.

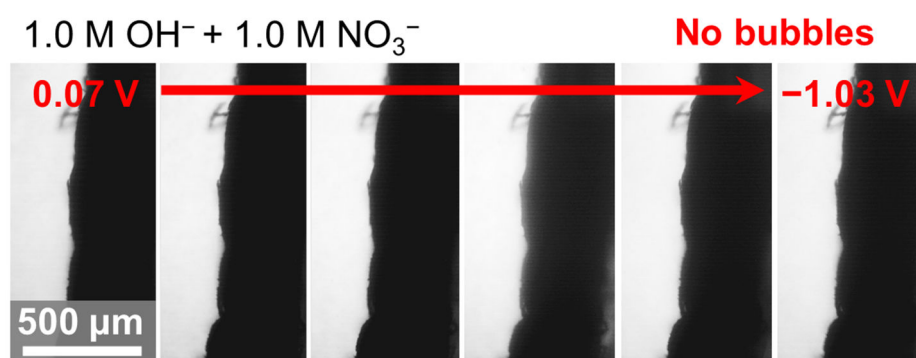

**Supplementary Fig. 27 | Characterizations of CoP-CNS.** Pictures of CoP-CNS in 1.0 M OH<sup>-</sup> with 1.0 M NO<sub>3</sub><sup>-</sup> captured by in situ optical microscope.

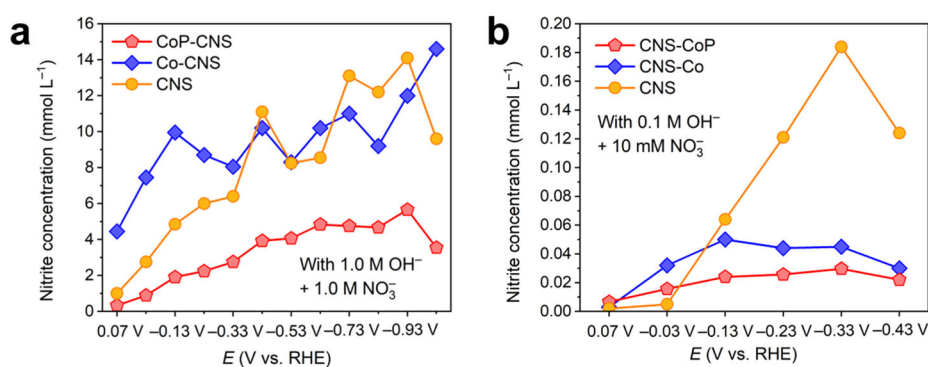

**Supplementary Fig. 28 | Product analysis.**  $c_{\text{NO}_2^-}$  in electrolytes after NITRR that catalyzed by CoP-CNS, Co-CNS and CNS, respectively. The original electrolyte containing **a**, 1.0 M OH<sup>-</sup> with 1.0 M NO<sub>3</sub><sup>-</sup> or **b**, 0.1 M OH<sup>-</sup> with 10 mM NO<sub>3</sub><sup>-</sup>, respectively.

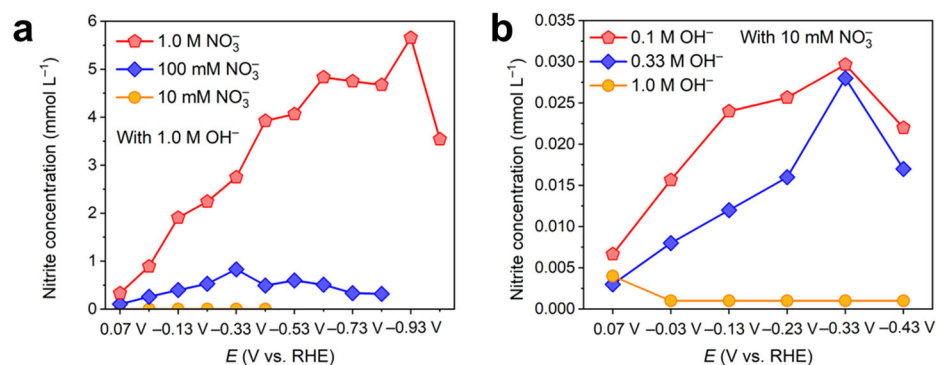

**Supplementary Fig. 29 | Product analysis.**  $c\text{NO}_2^-$  in electrolytes after NITRR that catalyzed by CoP-CNS at each given potential with different initial **a**,  $c\text{NO}_3^-$  and **b**,  $c\text{OH}^-$ , respectively.

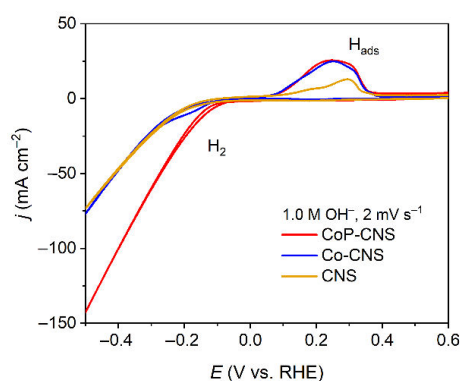

**Supplementary Fig. 30 | Electrochemical performances.** CV curves of CoP-CNS, Co-CNS and CNS in 1.0 M  $\text{OH}^-$ .

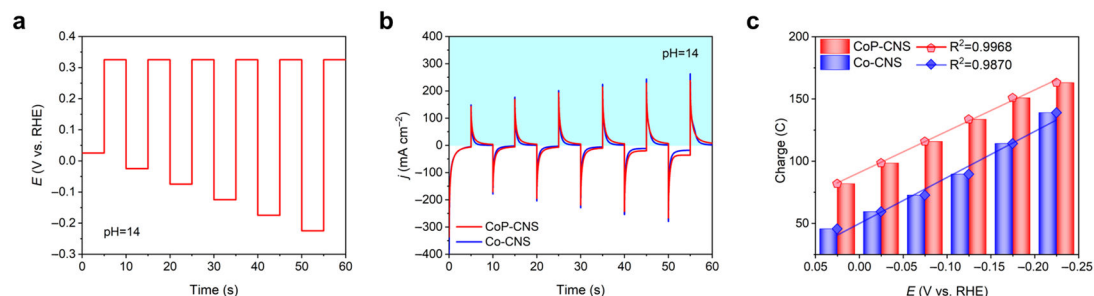

**Supplementary Fig. 31 | Electrochemical performances.** **a**, The pulse voltammetry protocol and **b**, the corresponding current response. **c**, Charge versus potential from pulse voltammetry.



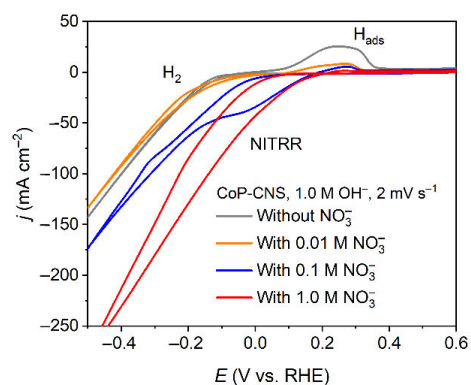

**Supplementary Fig. 32 | Electrochemical performances.** CV curves of CoP-CNS in 1 M OH<sup>-</sup> with and without NO<sub>3</sub><sup>-</sup>.

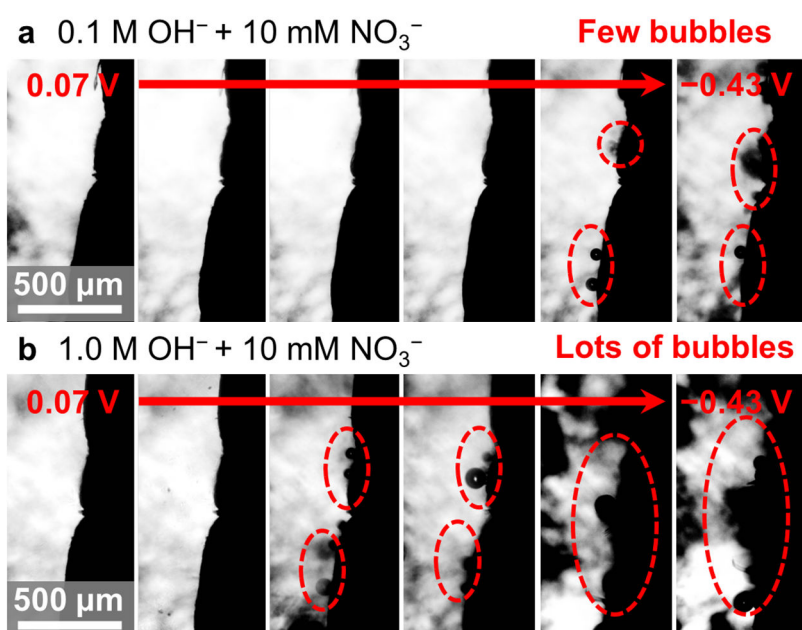

**Supplementary Fig. 33 | Characterizations of different catalysts.** Pictures of CoP-CNS in **a**, 0.1 M OH<sup>-</sup> with 10 mM NO<sub>3</sub><sup>-</sup> and **b**, 1.0 M OH<sup>-</sup> with 10 mM NO<sub>3</sub><sup>-</sup> captured by in situ optical microscope.

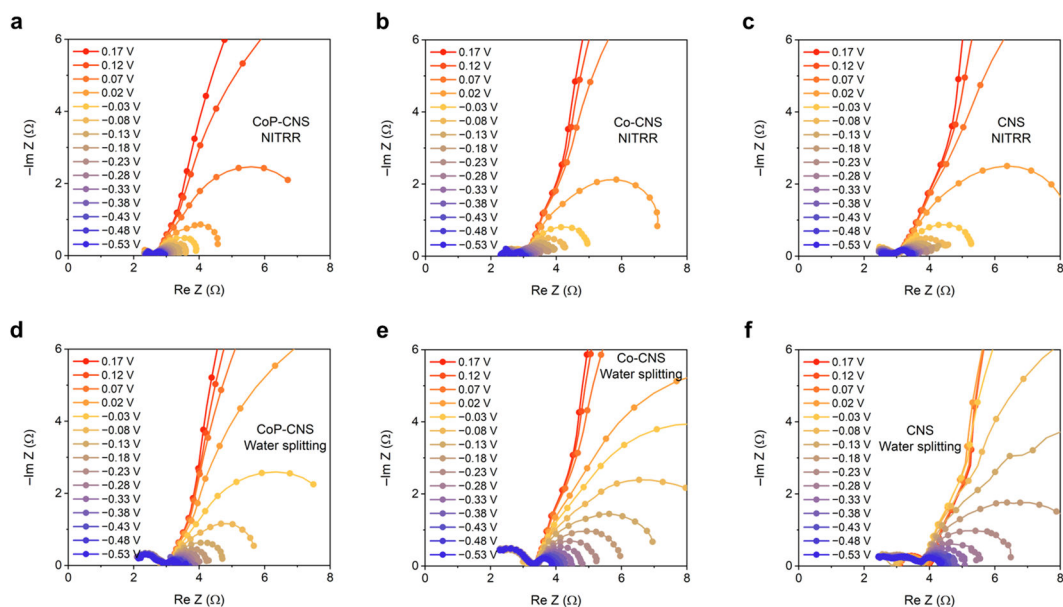

**Supplementary Fig. 34 | In situ EIS.** Nyquist plots of CoP-CNS, Co-CNS and CNS for **a-c**, NITRR and **d-f**, water splitting at different potentials.

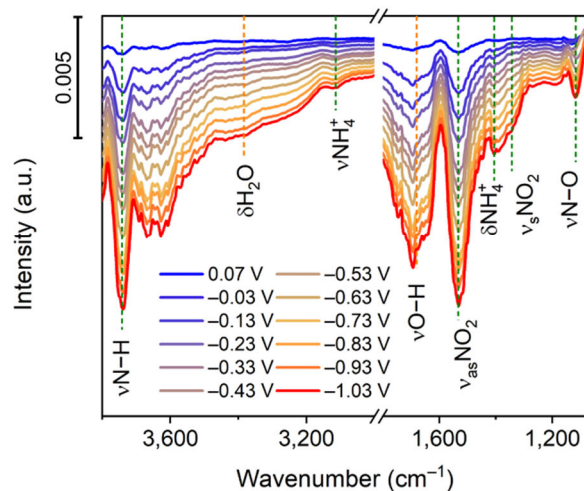

**Supplementary Fig. 35 | In situ FTIR.** In situ FTIR spectra of CoP-CNS under different applied potentials in 1.0 M  $\text{OH}^-$  with 1.0 M  $\text{NO}_3^-$ .

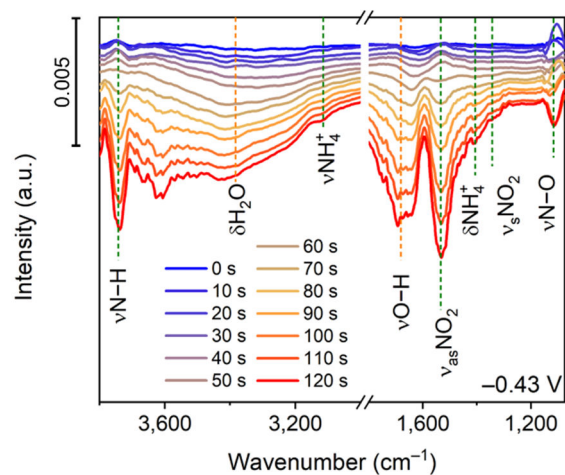

**Supplementary Fig. 36 | In situ FTIR.** In situ FTIR spectra of CoP-CNS under  $-0.43$  V vs. RHE in  $0.33$  M  $\text{OH}^-$  with  $10$  mM  $\text{NO}_3^-$ .

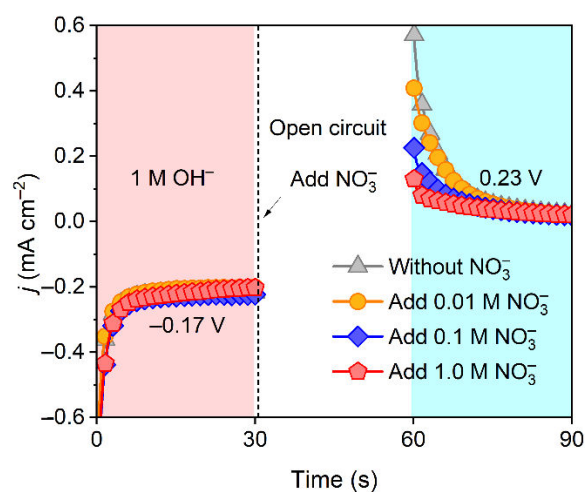

**Supplementary Fig. 37 | Electrochemical performances.** The intermittent NITRR electrochemical measurements for CoP-CNS at  $0.17$  V vs. RHE (0 to 30 s), open circuit state (30 to 60 s) and  $0.23$  V vs. RHE (60 to 90 s).

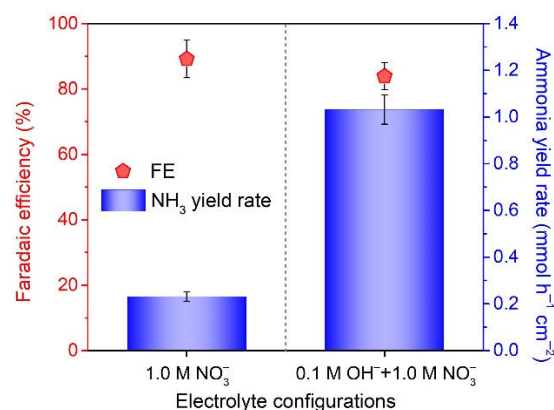

**Supplementary Fig. 38 | Electrochemical performances.** The FEs and NH<sub>3</sub> yields of CoP-CNS after 4 h continuous electrolysis in different electrolyte configurations at  $-0.43$  V vs. RHE.

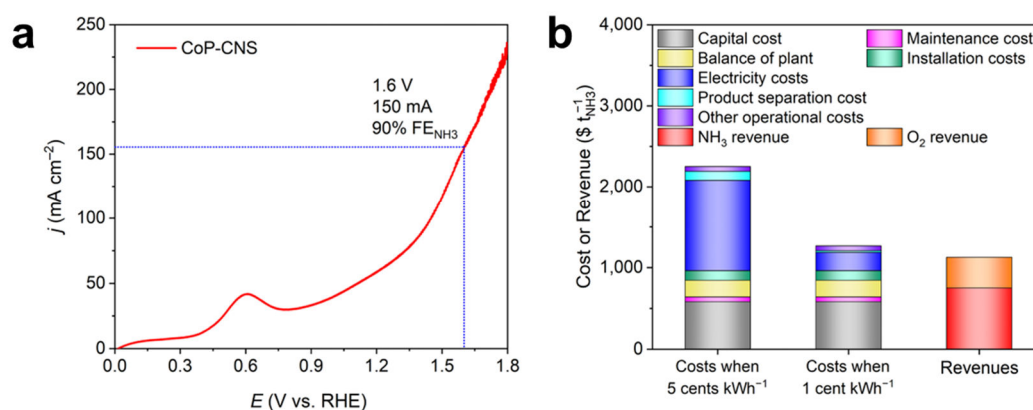

**Supplementary Fig. 39 | Techno-economic analysis.** **a**, Polarization curve and **b**, technoeconomic analysis of NITRR//OER using CoP-CNS as cathode and anode.

A membrane-electrode assembly (MEA) flow reactor NITRR//OER system using CoP-CNS as both the cathodic and anodic electrode was assembled to simulate the actual production (Supplementary Fig. 39a), which delivered a current density over  $150 \text{ mA cm}^{-2}$  with a NH<sub>3</sub> FE of about 90% at 1.6 V.

The techno-economic analysis was carried out using a modified model to calculate the total plant gate levelized cost of production with units of US\$ per ton of NH<sub>3</sub> via NITRR.

The total cost is separated into 7 components, namely the capital cost, electricity

cost, maintenance cost, product separation cost, installation cost, balance of plant cost and other operational costs. The input chemical cost can be ignored because the  $\text{NO}_3^-$ -containing wastewater can be directly used as reactant.

Capital cost is assumed to consist of the electrolyser and catalyst cost. The price of electrolyzer is assumed to be 10000 \$  $\text{m}^{-2}$ , and the catalyst cost is assumed to be 5% of the electrolyzer cost. A plant is assumed to produce 1 ton of  $\text{NH}_3$  per day and the plant lifetime is assumed to be 30 years. Capacity factor is the fraction of time the plant is expected to be operational on any given day and this is assumed to be 0.8. This means the plant will be operational 19.2 hours a day. The Faradaic efficiency is assumed to be 90% under the current density ( $i$ ) of 150  $\text{mA cm}^{-2}$  at 1.6 V.

The charge required to produce per ton  $\text{NH}_3$ :

$$Q = \frac{n(\text{NH}_3) \times N \times F}{FE} = \frac{1 \times 10^6 \text{ g} \times 8 \times 96485 \frac{\text{C}}{\text{mol}}}{17 \frac{\text{g}}{\text{mol}} \times 0.9} = 5.04 \times 10^{10} \text{ C}$$

Where N is 8 electrons are required to convert one  $\text{NO}_3^-$  molecule to  $\text{NH}_3$ ,  $n(\text{NH}_3)$  is the total amount (in units of moles) of  $\text{NH}_3$ ,  $F$  is the Faraday constant ( $F = 96485 \text{ C mol}^{-1}$ ), FE is the Faradaic efficiency.

The current required to sustain the process:

$$I = Q / \text{operational time} = 5.04 \times 10^{10} / 19.2 \times 3600 / 0.8 = 9.11 \times 10^5 \text{ A}$$

Electrolyzer cost = Area of electrolyzer  $\times$  Price of electrolyzer

$$= I/i \times 10000 = 9.11 \times 10^5 / 0.15 \times 10000 = 6.07 \times 10^6 \text{ \$}$$

Capital cost = (Electrolyzer cost + Catalyst cost) / plant lifetime

$$= 6.07 \times 10^6 \times (1 + 0.05) / (30 \times 365) = 582.05 \text{ \$ day}^{-1} = 582.05 \text{ \$ t}_{\text{NH}_3}^{-1}$$

The maintenance cost and other operational costs are assumed to be 10% of the capital cost, respectively. The balance of plant costs is assumed to be 35% of the capital cost. The installation costs is assumed to be 20% of the capital cost.

$$\text{Maintenance costs} = 582.05 \times 0.1 = 58.20 \text{ \$ t}_{\text{NH}_3}^{-1}$$

$$\text{Other operational costs} = 582.05 \times 0.1 = 58.20 \text{ \$ t}_{\text{NH}_3}^{-1}$$

$$\text{Installation costs} = 582.05 \times 0.2 = 116.41 \text{ \$ t}_{\text{NH}_3}^{-1}$$

$$\text{Balance of plant costs} = 582.05 \times 0.35 = 203.72 \text{ \$ t}_{\text{NH}_3}^{-1}$$

The power required to sustain the process:

$$P=Q \times E / 3600 = 5.04 \times 10^{10} \times 1 / 3600 \times 1.6 / 1000 = 2.24 \times 10^4 \text{ k Wh}$$

Where  $E$  is the cell voltage.

The electricity cost =  $P \times$  electricity price, while the product separation cost is assumed to be 10% of the electricity cost.

When electricity price is 5 cents  $\text{kWh}^{-1}$  (current level):

$$\text{Electricity cost} = P \times 0.05 = 2.24 \times 10^4 \times 0.05 = 1120.00 \text{ \$ t}_{\text{NH}_3}^{-1}$$

$$\text{Product separation costs} = 1120.00 \times 0.1 = 112.00 \text{ \$ t}_{\text{NH}_3}^{-1}$$

Thus the total cost for NITRR cell

$$= 582.05 + 58.20 + 58.20 + 116.41 + 203.72 + 1120.00 + 112.00 = 2250.58 \text{ \$ t}_{\text{NH}_3}^{-1}$$

When electricity price is reduced to 1 cents  $\text{kWh}^{-1}$ :

$$\text{Electricity cost} = P \times 0.01 = 2.24 \times 10^4 \times 0.01 = 224.00 \text{ \$ t}_{\text{NH}_3}^{-1}$$

$$\text{Product separation costs} = 224.00 \times 0.1 = 22.40 \text{ \$ t}_{\text{NH}_3}^{-1}$$

Thus the total cost for NITRR cell

$$= 582.05 + 58.20 + 58.20 + 116.41 + 203.72 + 224.00 + 22.40 = 1264.98 \text{ \$ t}_{\text{NH}_3}^{-1}$$

The total revenues can be calculated based on the market price of products from both anode ( $\text{O}_2$ ) and cathode ( $\text{NH}_3$ ). The mass of produced  $\text{O}_2$  at anode estimated as  $3.76 \text{ t t}_{\text{NH}_3}^{-1}$ . The price of  $\text{NH}_3$  is around  $750.00 \text{ \$ t}^{-1}$ , and the price of  $\text{O}_2$  is about  $100.00 \text{ \$ t}^{-1}$ .

Thus the total revenue = revenue of  $\text{NH}_3$  + revenue of  $\text{O}_2$

$$= 1 \times 750.00 + 3.76 \times 100.00 = 1126.00 \text{ \$}$$

The total revenue is roughly similar to the total cost after the reduction of electricity price, so it is expected to meet the economic benefits in the future to use NITRR for  $\text{NH}_3$  production to provide absorbent.



## Supplementary Tables

**Supplementary Table 1.** Comparing the NH<sub>3</sub> production performance of CoP-CNS with other reported NITRR electrocatalysts

| NO. | Electrocatalyst                          | Electrolyte                                                                  | Maximum NH <sub>3</sub> yield rate<br>(mmol h <sup>-1</sup> cm <sup>-2</sup> ) | FE at maximum<br>NH <sub>3</sub> yield rate (%) | Ref.      |
|-----|------------------------------------------|------------------------------------------------------------------------------|--------------------------------------------------------------------------------|-------------------------------------------------|-----------|
| 1   | CNS-CoP                                  | 1 M OH <sup>-</sup> + 1 M NO <sub>3</sub> <sup>-</sup>                       | 3.093                                                                          | 90.5                                            | This work |
|     | CNS-CoP on Cu foam                       | 1 M OH <sup>-</sup> + 1 M NO <sub>3</sub> <sup>-</sup>                       | 8.470                                                                          | 88.6                                            | This work |
| 2   | Ru-ST-12                                 | 1 M KOH + 1 M KNO <sub>3</sub>                                               | 1.17                                                                           | 100                                             | 1         |
| 3   | Cu/Cu <sub>2</sub> O MWAs                | 0.5 M Na <sub>2</sub> SO <sub>4</sub> + 200 ppm nitrate-N                    | 0.2449                                                                         | 95.8                                            | 2         |
| 4   | HSCu-AGB@C                               | 500 ppm KNO <sub>3</sub> + 0.1 M PBS                                         | 0.98                                                                           | 94.2                                            | 3         |
|     |                                          | 500 ppm KNO <sub>3</sub> + 0.1 M PBS                                         | 0.1172                                                                         | 82.7                                            |           |
| 5   | Fe SAC                                   | 0.5 M KNO <sub>3</sub> + 0.1 M K <sub>2</sub> SO <sub>4</sub>                | 0.46                                                                           | 74.9                                            | 4         |
|     |                                          | 0.1 M KNO <sub>3</sub> + 1.0 M KOH                                           | ---                                                                            | 86                                              |           |
| 6   | Cu milled 6 h under air                  | 0.1 M NaNO <sub>3</sub> + 1 M NaOH                                           | 0.2811                                                                         | 97                                              | 5         |
| 7   | Cu                                       | 0.1 M NaNO <sub>3</sub> + 1 M NaOH                                           | 0.0404                                                                         | 97                                              | 6         |
| 8   | Cu-Rh alloy                              | 0.1 M NaNO <sub>3</sub> + 1 M NaOH                                           | 0.0065                                                                         | 70                                              | 7         |
| 9   | Cu <sub>70</sub> Ni <sub>30</sub> porous | 0.1 M NaNO <sub>3</sub> + 1 M NaOH                                           | 0.0077                                                                         | 97.2                                            | 8         |
| 10  | Cu-incorporated PTCDA                    | 500 ppm NO <sub>3</sub> <sup>-</sup> + 0.1 M PBS                             | 0.0256                                                                         | 77                                              | 9         |
| 11  | TiO <sub>2-x</sub>                       | 0.5 M Na <sub>2</sub> SO <sub>4</sub> + 50 ppm nitrate-N                     | 0.045                                                                          | 85                                              | 10        |
| 12  | Ti                                       | 0.3 M KNO <sub>3</sub> + 0.1 M HNO <sub>3</sub>                              | ---                                                                            | 82                                              | 11        |
| 13  | Co/CoO NSAs                              | 0.1 M Na <sub>2</sub> SO <sub>4</sub> + 200 ppm NO <sub>3</sub> <sup>-</sup> | 0.1945                                                                         | 93.8                                            | 12        |
| 14  | Cu-Bi                                    | 0.1 M Na <sub>2</sub> SO <sub>4</sub> + 100 ppm NO <sub>3</sub> <sup>-</sup> | 0.0053                                                                         | 19                                              | 13        |
| 15  | Cu/rGO/GP                                | 0.02 M NaCl + 0.02 M NO <sub>3</sub> <sup>-</sup>                            | 0.0142                                                                         | 29.93                                           | 14        |
| 16  | Cu nanosheets                            | 0.1 M KOH + 10 mM KNO <sub>3</sub>                                           | 0.0230                                                                         | 99.7                                            | 15        |
| 17  | Pd cuboctahedron/C                       | 0.1 M NaOH + 20 mM NaNO <sub>3</sub>                                         | 0.00045                                                                        | 35                                              | 16        |
| 18  | [Co(DIM)Br <sub>2</sub> ] <sup>+</sup>   | 50 mM KBr + 0.1 M NaNO <sub>3</sub>                                          | ---                                                                            | 97                                              | 17        |
| 19  | Pd (1 1 1)                               | 0.1 M Na <sub>2</sub> SO <sub>4</sub> + 0.1 M NO <sub>3</sub> <sup>-</sup>   | 0.5485                                                                         | 79.91                                           | 18        |
| 20  | Fluorine doped carbon                    | 0.05 M H <sub>2</sub> SO <sub>4</sub> + 200 ppm KNO <sub>3</sub>             | ---                                                                            | 20                                              | 19        |
| 21  | 20 wt % Au/C                             | 0.5 M K <sub>2</sub> SO <sub>4</sub> + 1 mM KNO <sub>3</sub>                 | 0.001584                                                                       | 26                                              | 20        |
| 22  | Cu <sub>49</sub> Fe <sub>1</sub>         | 0.1 M K <sub>2</sub> SO <sub>4</sub> + 200 ppm KNO <sub>3</sub>              | 0.236                                                                          | 94.5                                            | 21        |
| 23  | Copper electrode with fiber 1% Pd        | 600 mg L <sup>-1</sup> NaNO <sub>3</sub>                                     | 0.038                                                                          | 38                                              | 22        |

|    |                                     |                                                                                                            |        |                    |    |
|----|-------------------------------------|------------------------------------------------------------------------------------------------------------|--------|--------------------|----|
| 24 | Co <sub>3</sub> O <sub>4</sub> Rods | 0.05 M Na <sub>2</sub> SO <sub>4</sub> + 200 mg L <sup>-1</sup> NO <sub>3</sub> <sup>-</sup> -N            | 0.0303 | 100                | 23 |
| 25 | Ir NTs                              | 0.1 M HClO <sub>4</sub> + 1 M NaNO <sub>3</sub>                                                            | ---    | 84.7               | 24 |
| 26 | Ni <sub>2</sub> P/NF-EHP            | 0.5 g L <sup>-1</sup> Na <sub>2</sub> SO <sub>4</sub> + 55 mg L <sup>-1</sup> NO <sub>3</sub> <sup>-</sup> | 0.0938 | 64.2 (selectivity) | 25 |
| 27 | CuCoSP                              | 0.1 M KNO <sub>3</sub> + 0.1 M KOH                                                                         | 1.17   | 93.3               | 26 |

**Supplementary Table 2.** Comparing the NH<sub>3</sub> production performance of CoP-CNS with reported NRR electrocatalysts

| NO. | Electrocatalyst                                   | Electrolyte                                                     | Maximum NH <sub>3</sub> yield rate       | FE at maximum                  | Ref.      |
|-----|---------------------------------------------------|-----------------------------------------------------------------|------------------------------------------|--------------------------------|-----------|
|     |                                                   |                                                                 | (mmol h <sup>-1</sup> cm <sup>-2</sup> ) | NH <sub>3</sub> yield rate (%) |           |
| 1   | CNS-CoP                                           | 1 M OH <sup>-</sup> + 1 M NO <sub>3</sub> <sup>-</sup>          | 3.093                                    | 90.5                           | This work |
|     | CNS-CoP on Cu foam                                | 1 M OH <sup>-</sup> + 1 M NO <sub>3</sub> <sup>-</sup>          | 8.470                                    | 88.6                           | This work |
| 2   | Mn-N-C SAC                                        | N <sub>2</sub> -saturated 0.1 M NaOH                            | 0.00438                                  | 32.02 (MAX)                    | 27        |
|     |                                                   |                                                                 | 0.00536 (MAX)                            | ≈8                             |           |
| 3   | [P <sub>6,6,6,14</sub> ] <sup>+</sup> Induced NRR | 0.5 bar N <sub>2</sub> + 19.5 bar N <sub>2</sub>                | 0.19                                     | 69                             | 28        |
| 4   | mAu <sub>3</sub> Rh/NF                            | N <sub>2</sub> -saturated 0.1 M Na <sub>2</sub> SO <sub>4</sub> | 0.00032                                  | 23.84                          | 29        |
| 5   | WP <sub>2</sub>                                   | N <sub>2</sub> -saturated 0.05 M H <sub>2</sub> SO <sub>4</sub> | 0.00042                                  | 7.20                           | 30        |
| 6   | NS-Ti <sub>3</sub> C <sub>2</sub> T <sub>x</sub>  | N <sub>2</sub> -saturated 0.05 M H <sub>2</sub> SO <sub>4</sub> | 0.00060                                  | 6.6                            | 31        |
| 7   | Pd icosahedron                                    | N <sub>2</sub> -saturated 0.1 M Li <sub>2</sub> SO <sub>4</sub> | 0.0010                                   | 31.98                          | 32        |
| 8   | Pd-Ag-S PNSs                                      | N <sub>2</sub> -saturated 0.1 M Na <sub>2</sub> SO <sub>4</sub> | 0.00023                                  | 18.41                          | 33        |
| 9   | BP (black phosphorus)                             | N <sub>2</sub> -saturated 0.1 M HCl                             | 0.00060                                  | 23.3                           | 34        |
| 10  | Ag <sub>3</sub> Cu BPNS                           | N <sub>2</sub> -saturated 0.1 M Na <sub>2</sub> SO <sub>4</sub> | 0.00058                                  | 13.28                          | 35        |
| 11  | BD-Ag/AF                                          | N <sub>2</sub> -saturated 0.1 M Na <sub>2</sub> SO <sub>4</sub> | 0.000075                                 | 7.36                           | 36        |
| 12  | B-VS <sub>2</sub> /CC                             | N <sub>2</sub> -saturated 0.5 M LiClO <sub>4</sub>              | 0.00066                                  | 9.5                            | 37        |
| 13  | Exfoliated NbS <sub>2</sub>                       | N <sub>2</sub> -saturated 0.1 M HCl                             | 0.00022                                  | 10.12                          | 38        |
| 14  | CrO <sub>0.66</sub> N <sub>0.56</sub>             | ---                                                             | 0.00032                                  | ≈0.33                          | 39        |
| 15  | Bi@C                                              | N <sub>2</sub> -saturated 0.1 M Na <sub>2</sub> SO <sub>4</sub> | 0.00006                                  | ≈1.5                           | 40        |
| 16  | ECOF@BCP                                          | N <sub>2</sub> -saturated 0.1 M HCl                             | 0.01689                                  | 54.5                           | 41        |
| 17  | Porous bimetallic Pd-Ag                           | N <sub>2</sub> -saturated 0.5 M LiClO <sub>4</sub>              | 0.00268                                  | 19.6                           | 42        |
| 18  | S/Au NWs                                          | N <sub>2</sub> -saturated 0.1 M Na <sub>2</sub> SO <sub>4</sub> | 0.00050                                  | 15.34                          | 43        |
| 19  | CoVP@NiFeV-LDH                                    | N <sub>2</sub> -saturated 0.05 M H <sub>2</sub> SO <sub>4</sub> | 0.0016                                   | 13.8                           | 44        |
| 20  | BCC PdCu                                          | N <sub>2</sub> -saturated 0.5 M LiCl                            | 0.00214                                  | 11.5                           | 45        |

|    |                                             |                                                                 |         |       |    |
|----|---------------------------------------------|-----------------------------------------------------------------|---------|-------|----|
| 21 | $\alpha$ -Fe@Fe <sub>3</sub> O <sub>4</sub> | N <sub>2</sub> -saturated H <sub>2</sub> O                      | 0.00008 | 32    | 46 |
| 22 | Fe-Ni <sub>2</sub> P                        | N <sub>2</sub> -saturated 0.1 M HCl                             | 0.00104 | 7.92  | 47 |
| 23 | Au <sub>25</sub> -Cys-Mo                    | N <sub>2</sub> -saturated 0.1 M HCl                             | 0.00061 | 26.5  | 48 |
| 24 | SAB/C                                       | N <sub>2</sub> -saturated 10 M LiCl                             | 0.00342 | 71    | 49 |
| 25 | Cu/PI-300                                   | N <sub>2</sub> -saturated 0.1 M KOH                             | 0.00073 | 6.56  | 50 |
| 26 | B <sub>4</sub> C nanosheet                  | N <sub>2</sub> -saturated 0.1 M HCl                             | 0.00016 | 15.95 |    |
|    |                                             | N <sub>2</sub> -saturated 0.1 M Na <sub>2</sub> SO <sub>4</sub> | 0.00009 | 9.24  | 51 |
| 27 | Eex-COF/NC                                  | N <sub>2</sub> -saturated 0.1 M KOH                             | 0.00074 | 45.43 | 52 |

**Supplementary Table 3.** Indicators comparison of CO<sub>2</sub> capture technologies

| Technology                                          | CO <sub>2</sub> treatment cost<br>(\$ t <sub>CO2</sub> <sup>-1</sup> ) | CO <sub>2</sub> absorptivity<br>(%) | Ref.  |
|-----------------------------------------------------|------------------------------------------------------------------------|-------------------------------------|-------|
| Absorption system with<br>NH <sub>3</sub> absorbent | 40-60                                                                  | 90-99                               | 53    |
| Absorption system with<br>MEA absorbent             | 40-100                                                                 | 86-92                               | 53,54 |
| CO <sub>2</sub> capture membrane                    | 22-120                                                                 | 60-90                               | 55,56 |

### Supplementary References

- Li, J. *et al.* Efficient ammonia electrosynthesis from nitrate on strained ruthenium nanoclusters. *J. Am. Chem. Soc.* **142**, 7036–7046 (2020).
- Wang, Y., Zhou, W., Jia, R., Yu, Y. & Zhang, B. Unveiling the activity origin of a copper-based electrocatalyst for selective nitrate reduction to ammonia. *Angew. Chem. Int. Ed.* **59**, 5350–5354 (2020).
- Hu, Q. *et al.* Grain boundaries engineering of hollow copper nanoparticles enables highly efficient ammonia electrosynthesis from nitrate. *CCS Chem.* **4**, 2053–2064 (2021).
- Wu, Z.-Y. *et al.* Electrochemical ammonia synthesis via nitrate reduction on Fe single atom catalyst. *Nat. Commun.* **12**, 1–10 (2021).
- Reyter, D., Chamoulaud, G., Bélanger, D. & Roué, L. Electrocatalytic reduction of nitrate on copper electrodes prepared by high-energy ball milling. *J. Electroanal. Chem.* **596**, 13–24

(2006).

6. Reyter, D., Bélanger, D. & Roué, L. Study of the electroreduction of nitrate on copper in alkaline solution. *Electrochim. Acta* **53**, 5977–5984 (2008).
7. Comisso, N. *et al.* Electrodeposition of Cu–Rh alloys and their use as cathodes for nitrate reduction. *Electrochem. Commun.* **25**, 91–93 (2012).
8. Mattarozzi, L. *et al.* Hydrogen evolution assisted electrodeposition of porous Cu–Ni alloy electrodes and their use for nitrate reduction in alkali. *Electrochim. Acta* **140**, 337–344 (2014).
9. Chen, G.-F. *et al.* Electrochemical reduction of nitrate to ammonia via direct eight-electron transfer using a copper-molecular solid catalyst. *Nat. Energy* **5**, 605–613 (2020).
10. Jia, R. *et al.* Boosting selective nitrate electroreduction to ammonium by constructing oxygen vacancies in TiO<sub>2</sub>. *ACS Catal.* **10**, 3533–3540 (2020).
11. McEnaney, J. M. *et al.* Electrolyte engineering for efficient electrochemical nitrate reduction to ammonia on a titanium electrode. *ACS Sustain. Chem. Eng.* **8**, 2672–2681 (2020).
12. Yu, Y., Wang, C., Yu, Y., Wang, Y. & Zhang, B. Promoting selective electroreduction of nitrates to ammonia over electron-deficient Co modulated by rectifying Schottky contacts. *Sci. China Chem.* **63**, 1469–1476 (2020).
13. Gao, W. *et al.* Preparation of a novel Cu–Sn–Bi cathode and performance on nitrate electroreduction. *Water Sci. Technol.* **79**, 198–206 (2019).
14. Yin, D. *et al.* In situ growth of copper/reduced graphene oxide on graphite surfaces for the electrocatalytic reduction of nitrate. *Electrochim. Acta* **324**, 134846 (2019).
15. Fu, X. *et al.* Alternative route for electrochemical ammonia synthesis by reduction of nitrate on copper nanosheets. *Appl. Mater. Today* **19**, 100620 (2020).
16. Hao, D. *et al.* Emerging alternative for artificial ammonia synthesis through catalytic nitrate reduction. *J. Mater. Sci. Technol.* **77**, 163–168 (2021).
17. Xu, S. *et al.* A flexible, redox-active macrocycle enables the electrocatalytic reduction of nitrate to ammonia by a cobalt complex. *Chem. Sci.* **9**, 4950–4958 (2018).
18. Han, Y. *et al.* Facet-controlled palladium nanocrystalline for enhanced nitrate reduction towards ammonia. *J. Colloid Interface Sci.* **600**, 620–628 (2021).
19. Li, Y. *et al.* A robust metal-free electrocatalyst for nitrate reduction reaction to synthesize

- ammonia. *Mater. Today Phys.* **19**, 100431 (2021).
20. Choi, J. *et al.* Electroreduction of nitrates, nitrites, and gaseous nitrogen oxides: a potential source of ammonia in dinitrogen reduction studies. *ACS Energy Lett.* **5**, 2095–2097 (2020).
  21. Wang, C. *et al.* Metasequoia-like nanocrystal of iron-doped copper for efficient electrocatalytic nitrate reduction into ammonia in neutral media. *ChemSusChem* **14**, 1825–1829 (2021).
  22. Beltrame, T. F. *et al.* Electrochemical nitrate reduction of brines: improving selectivity to N<sub>2</sub> by the use of Pd/activated carbon fiber catalyst. *Chemosphere* **279**, 130832 (2021).
  23. Li, K., Chen, C., Bian, X., Sun, T. & Jia, J. Electrolytic nitrate reduction using Co<sub>3</sub>O<sub>4</sub> rod-like and sheet-like cathodes with the control of (220) facet exposure and Co<sup>2+</sup>/Co<sup>3+</sup> ratio. *Electrochim. Acta* **362**, 137121 (2020).
  24. Zhu, J.-Y. *et al.* Iridium nanotubes as bifunctional electrocatalysts for oxygen evolution and nitrate reduction reactions. *ACS Appl. Mater. Inter.* **12**, 14064–14070 (2020).
  25. Huo, S. *et al.* Fabrication of porous configured Ni<sub>2</sub>P/Ni foam catalyst and its boosted properties for pH-universal hydrogen evolution reaction and efficient nitrate reduction. *ChemCatChem* **12**, 4600–4610 (2020).
  26. He, W. *et al.* Splicing the active phases of copper/cobalt-based catalysts achieves high-rate tandem electroreduction of nitrate to ammonia. *Nat. Commun.* **13**, 1129 (2022).
  27. Wang, X. *et al.* Folic acid self-assembly enabling manganese single-atom electrocatalyst for selective nitrogen reduction to ammonia. *Nano-micro Lett.* **13**, 1–12 (2021).
  28. Suryanto, B. H. R. *et al.* Nitrogen reduction to ammonia at high efficiency and rates based on a phosphonium proton shuttle. *Science* **372**, 1187–1191 (2021).
  29. Wang, H. *et al.* Enhanced electrocatalytic performance of mesoporous Au–Rh bimetallic films for ammonia synthesis. *Chem. Eng. J.* **418**, 129493 (2021).
  30. Han, D. *et al.* Superior surface electron energy level endows WP<sub>2</sub> nanowire arrays with N<sub>2</sub> fixation functions. *J. Energy Chem.* **59**, 55–62 (2021).
  31. Zeng, Y. *et al.* Synergistic performance of nitrogen and sulfur co-doped Ti<sub>3</sub>C<sub>2</sub>T<sub>X</sub> for electrohydrogenation of N<sub>2</sub> to NH<sub>3</sub>. *J. Alloys Compd.* **869**, 159335 (2021).
  32. Cai, W. *et al.* The twinned Pd nanocatalyst exhibits sustainable NRR electrocatalytic performance by promoting the desorption of NH<sub>3</sub>. *J. Mater. Chem. A* **9**, 13483–13489 (2021).

33. Wang, H. *et al.* Three-dimensional Pd–Ag–S porous nanosponges for electrocatalytic nitrogen reduction to ammonia. *Nanoscale* **12**, 13507–13512 (2020).
34. Liu, D. *et al.* Photoelectrochemical synthesis of ammonia with black phosphorus. *Adv. Funct. Mater.* **30**, 2002731 (2020).
35. Yu, H. *et al.* Bimetallic Ag<sub>3</sub>Cu porous networks for ambient electrolysis of nitrogen to ammonia. *J. Mater. Chem. A* **7**, 12526–12531 (2019).
36. Ji, L., Shi, X., Asiri, A. M., Zheng, B. & Sun, X. Nanostructured bromide-derived Ag film: an efficient electrocatalyst for N<sub>2</sub> reduction to NH<sub>3</sub> under ambient conditions. *Inorg. Chem.* **57**, 14692–14697 (2018).
37. Li, Q., Guo, Y., Tian, Y., Liu, W. & Chu, K. Activating VS<sub>2</sub> basal planes for enhanced NRR electrocatalysis: the synergistic role of S-vacancies and B dopants. *J. Mater. Chem. A* **8**, 16195–16202 (2020).
38. Wang, H. *et al.* Exfoliated metallic niobium disulfate nanosheets for enhanced electrochemical ammonia synthesis and Zn–N<sub>2</sub> battery. *Appl. Catal. B Environ.* **270**, 118892 (2020).
39. Yao, Y. *et al.* Chromium oxynitride electrocatalysts for electrochemical synthesis of ammonia under ambient conditions. *Small Methods* **3**, 1800324 (2019).
40. Yang, X., Kang, L., Wang, C.-J., Liu, F. & Chen, Y. Electrochemical ammonia synthesis from nitrite assisted by in situ generated hydrogen atoms on a nickel phosphide catalyst. *Chem. Commun.* **57**, 7176–7179 (2021).
41. Liu, S. *et al.* Proton-filtering covalent organic frameworks with superior nitrogen penetration flux promote ambient ammonia synthesis. *Nat. Catal.* **4**, 322–331 (2021).
42. Nazemi, M. *et al.* Electrosynthesis of ammonia using porous bimetallic Pd–Ag nanocatalysts in liquid-and gas-phase systems. *ACS Catal.* **10**, 10197–10206 (2020).
43. Wang, H. *et al.* Amorphous sulfur decorated gold nanowires as efficient electrocatalysts toward ambient ammonia synthesis. *ACS Sustain. Chem. Eng.* **7**, 19969–19974 (2019).
44. Arif, M. *et al.* Hierarchical hollow nanotubes of NiFeV-layered double hydroxides@ CoVP heterostructures towards efficient, pH-universal electrocatalytical nitrogen reduction reaction to ammonia. *Appl. Catal. B Environ.* **265**, 118559 (2020).
45. Tong, W. *et al.* Crystal-phase-engineered PdCu electrocatalyst for enhanced ammonia



- synthesis. *Angew. Chem.* **132**, 2671–2675 (2020).
46. Suryanto, B. H. R. *et al.* Rational electrode-electrolyte design for efficient ammonia electrosynthesis under ambient conditions. *ACS Energy Lett.* **3**, 1219–1224 (2018).
  47. Guo, C. *et al.* Fe-doped Ni<sub>2</sub>P nanosheets with porous structure for electroreduction of nitrogen to ammonia under ambient conditions. *Appl. Catal. B Environ.* **263**, 118296 (2020).
  48. Tan, Y. *et al.* Fabrication of an Au<sub>25</sub>-Cys-Mo electrocatalyst for efficient nitrogen reduction to ammonia under ambient conditions. *Small* **17**, 2100372 (2021).
  49. Wang, M. *et al.* Salting-out effect promoting highly efficient ambient ammonia synthesis. *Nat. Commun.* **12**, 1–10 (2021).
  50. Lin, Y.-X. *et al.* Boosting selective nitrogen reduction to ammonia on electron-deficient copper nanoparticles. *Nat. Commun.* **10**, 1–7 (2019).
  51. Qiu, W. *et al.* High-performance artificial nitrogen fixation at ambient conditions using a metal-free electrocatalyst. *Nat. Commun.* **9**, 1–8 (2018).
  52. Liu, S. *et al.* Facilitating nitrogen accessibility to boron-rich covalent organic frameworks via electrochemical excitation for efficient nitrogen fixation. *Nat. Commun.* **10**, 1–9 (2019).
  53. Zhang, C. Absorption principle and techno-economic analysis of CO<sub>2</sub> absorption technologies: A review. *IOP Conf. Ser.: Earth Environ. Sci.* **657**, 012045 (2021).
  54. Jiang, K., Yu, H., Yu, J. & Li, K. Advancement of ammonia-based post-combustion CO<sub>2</sub> capture technology: Process modifications. *Fuel Process. Technol.* **210**, 106544 (2020).
  55. Asadi, J. & Kazemipoor, P. Techno-economic analysis of membrane-based processes for flexible CO<sub>2</sub> capturing from power plants. *Energy Convers. Manage.* **246**, 114633 (2021).
  56. Wu, H. *et al.* Membrane technology for CO<sub>2</sub> capture: From pilot-scale investigation of two-stage plant to actual system design. *J. Membr. Sci.* **624**, 119137 (2021).
